# Supplementary material for: Phenotypic, molecular and pathogenic characterization of Colletotrichum scovillei infecting Capsicum species in Rio de Janeiro, Brazil
Source: PeerJ. 2021 Apr 27;9:e10782. doi: 10.7717/peerj.10782 (PMC8086587; doi:10.7717/peerj.10782)
Supplement: Supplemental Information 5 [file peerj-09-10782-s005.xlsx]

## Sheet: GenBank accesions links
Gene	ID Submission	Isolates	GenBank accession numbers	GenBank accesion link
ACT	actin
ACT	BankIt2229175	Colletotrichum_scovillei_UEL01	MN121771	https://www.ncbi.nlm.nih.gov/nuccore/MN121771
ACT	BankIt2229175	Colletotrichum_scovillei_UEL09	MN121772	https://www.ncbi.nlm.nih.gov/nuccore/MN121772
ACT	BankIt2229175	Colletotrichum_scovillei_UEL12	MN121773	https://www.ncbi.nlm.nih.gov/nuccore/MN121773
ACT	BankIt2229175	Colletotrichum_scovillei_UEL22	MN121774	https://www.ncbi.nlm.nih.gov/nuccore/MN121774
ACT	BankIt2229175	Colletotrichum_scovillei_UEL42	MN121775	https://www.ncbi.nlm.nih.gov/nuccore/MN121775
ACT	BankIt2229175	Colletotrichum_scovillei_UEL53	MN121776	https://www.ncbi.nlm.nih.gov/nuccore/MN121776
ACT	BankIt2229175	Colletotrichum_scovillei_UEL71	MN121777	https://www.ncbi.nlm.nih.gov/nuccore/MN121777
ACT	BankIt2229175	Colletotrichum_scovillei_UEL72	MN121778	https://www.ncbi.nlm.nih.gov/nuccore/MN121778
ACT	BankIt2229175	Colletotrichum_scovillei_UEL81F	MN121779	https://www.ncbi.nlm.nih.gov/nuccore/MN121779
ACT	BankIt2229175	Colletotrichum_scovillei_UEL81U	MN121780	https://www.ncbi.nlm.nih.gov/nuccore/MN121780
GAPDH	glyceraldehyde 3-phosphate dehydrogenase
GAPDH	BankIt2235337	Colletotrichum_scovillei_UEL01	MN121781	https://www.ncbi.nlm.nih.gov/nuccore/MN121781
GAPDH	BankIt2235337	Colletotrichum_scovillei_UEL09	MN121782	https://www.ncbi.nlm.nih.gov/nuccore/MN121782
GAPDH	BankIt2235337	Colletotrichum_scovillei_UEL12	MN121783	https://www.ncbi.nlm.nih.gov/nuccore/MN121783
GAPDH	BankIt2235337	Colletotrichum_scovillei_UEL22	MN121784	https://www.ncbi.nlm.nih.gov/nuccore/MN121784
GAPDH	BankIt2235337	Colletotrichum_scovillei_UEL27	MN121785	https://www.ncbi.nlm.nih.gov/nuccore/MN121785
GAPDH	BankIt2235337	Colletotrichum_scovillei_UEL42	MN121786	https://www.ncbi.nlm.nih.gov/nuccore/MN121786
GAPDH	BankIt2235337	Colletotrichum_scovillei_UEL53	MN121787	https://www.ncbi.nlm.nih.gov/nuccore/MN121787
GAPDH	BankIt2235337	Colletotrichum_scovillei_UEL71	MN121788	https://www.ncbi.nlm.nih.gov/nuccore/MN121788
GAPDH	BankIt2235337	Colletotrichum_scovillei_UEL72	MN121789	https://www.ncbi.nlm.nih.gov/nuccore/MN121789
GAPDH	BankIt2235337	Colletotrichum_scovillei_UEL81F	MN121790	https://www.ncbi.nlm.nih.gov/nuccore/MN121790
GAPDH	BankIt2235337	Colletotrichum_scovillei_UEL81U	MN121791	https://www.ncbi.nlm.nih.gov/nuccore/MN121791
ITS	rDNA spacer region
ITS	BankIt2235338	Colletotrichum_scovillei_UEL01	MN121792	https://www.ncbi.nlm.nih.gov/nuccore/MN121792
ITS	BankIt2235338	Colletotrichum_scovillei_UEL09	MN121793	https://www.ncbi.nlm.nih.gov/nuccore/MN121793
ITS	BankIt2235338	Colletotrichum_scovillei_UEL12	MN121794	https://www.ncbi.nlm.nih.gov/nuccore/MN121794
ITS	BankIt2235338	Colletotrichum_scovillei_UEL22	MN121795	https://www.ncbi.nlm.nih.gov/nuccore/MN121795
ITS	BankIt2235338	Colletotrichum_scovillei_UEL27	MN121796	https://www.ncbi.nlm.nih.gov/nuccore/MN121796
ITS	BankIt2235338	Colletotrichum_scovillei_UEL42	MN121797	https://www.ncbi.nlm.nih.gov/nuccore/MN121797
ITS	BankIt2235338	Colletotrichum_scovillei_UEL53	MN121798	https://www.ncbi.nlm.nih.gov/nuccore/MN121798
ITS	BankIt2235338	Colletotrichum_scovillei_UEL71	MN121799	https://www.ncbi.nlm.nih.gov/nuccore/MN121799
ITS	BankIt2235338	Colletotrichum_scovillei_UEL72	MN121800	https://www.ncbi.nlm.nih.gov/nuccore/MN121800
ITS	BankIt2235338	Colletotrichum_scovillei_UEL81F	MN121801	https://www.ncbi.nlm.nih.gov/nuccore/MN121801
ITS	BankIt2235338	Colletotrichum_scovillei_UEL81U	MN121802	https://www.ncbi.nlm.nih.gov/nuccore/MN121802
CAL	calmodulin
CAL	BankIt2239982	Colletotrichum_scovillei_UEL01	MN121803	https://www.ncbi.nlm.nih.gov/nuccore/MN121803
CAL	BankIt2239982	Colletotrichum_scovillei_UEL09	MN121804	https://www.ncbi.nlm.nih.gov/nuccore/MN121804
CAL	BankIt2239982	Colletotrichum_scovillei_UEL12	MN121805	https://www.ncbi.nlm.nih.gov/nuccore/MN121805
CAL	BankIt2239982	Colletotrichum_scovillei_UEL22	MN121806	https://www.ncbi.nlm.nih.gov/nuccore/MN121806
CAL	BankIt2239982	Colletotrichum_scovillei_UEL42	MN121807	https://www.ncbi.nlm.nih.gov/nuccore/MN121807
CAL	BankIt2239982	Colletotrichum_scovillei_UEL71	MN121808	https://www.ncbi.nlm.nih.gov/nuccore/MN121808
CAL	BankIt2239982	Colletotrichum_scovillei_UEL72	MN121809	https://www.ncbi.nlm.nih.gov/nuccore/MN121809
CAL	BankIt2239982	Colletotrichum_scovillei_UEL81F	MN121810	https://www.ncbi.nlm.nih.gov/nuccore/MN121810
CAL	BankIt2239982	Colletotrichum_scovillei_UEL81U	MN121811	https://www.ncbi.nlm.nih.gov/nuccore/MN121811
TUB	β-tubulin
TUB	BankIt2239989	Colletotrichum_scovillei_UEL01	MN121812	https://www.ncbi.nlm.nih.gov/nuccore/MN121812
TUB	BankIt2239989	Colletotrichum_scovillei_UEL09	MN121813	https://www.ncbi.nlm.nih.gov/nuccore/MN121813
TUB	BankIt2239989	Colletotrichum_scovillei_UEL12	MN121814	https://www.ncbi.nlm.nih.gov/nuccore/MN121814
TUB	BankIt2239989	Colletotrichum_scovillei_UEL22	MN121815	https://www.ncbi.nlm.nih.gov/nuccore/MN121815
TUB	BankIt2239989	Colletotrichum_scovillei_UEL27	MN121816	https://www.ncbi.nlm.nih.gov/nuccore/MN121816
TUB	BankIt2239989	Colletotrichum_scovillei_UEL42	MN121817	https://www.ncbi.nlm.nih.gov/nuccore/MN121817
TUB	BankIt2239989	Colletotrichum_scovillei_UEL53	MN121818	https://www.ncbi.nlm.nih.gov/nuccore/MN121818
TUB	BankIt2239989	Colletotrichum_scovillei_UEL71	MN121819	https://www.ncbi.nlm.nih.gov/nuccore/MN121819
TUB	BankIt2239989	Colletotrichum_scovillei_UEL72	MN121820	https://www.ncbi.nlm.nih.gov/nuccore/MN121820
TUB	BankIt2239989	Colletotrichum_scovillei_UEL81F	MN121821	https://www.ncbi.nlm.nih.gov/nuccore/MN121821
TUB	BankIt2239989	Colletotrichum_scovillei_UEL81U	MN121822	https://www.ncbi.nlm.nih.gov/nuccore/MN121822
