# Supplementary material for: Phenotypic, molecular and pathogenic characterization of Colletotrichum scovillei infecting Capsicum species in Rio de Janeiro, Brazil
Source: PeerJ. 2021 Apr 27;9:e10782. doi: 10.7717/peerj.10782 (PMC8086587; doi:10.7717/peerj.10782)
Supplement: Supplemental Information 6 [file peerj-09-10782-s006.xlsx]

## Sheet: Data_Ripe fruits
Accession	rep	day1	day2	day3	day4	day5	day6	day7	day8	Score	AUDPC
UEL 193	1	1	1	1	1	1	3	4	6	6	10.5
	2	1	1	1	1	1	1	4	6	6	9.0
	3	1	1	1	1	1	1	4	6	6	9.5
	4	1	1	1	1	1	1	4	6	6	10.0
	5	1	1	1	1	1	1	3	4	4	10.0
UEL 157	1	1	1	1	3	4	4	4	4	4	16.5
	2	1	1	1	1	3	4	6	6	6	15.0
	3	1	1	1	1	3	4	4	6	6	14.5
	4	1	1	1	3	4	4	6	6	6	19.0
	5	1	1	1	1	3	4	6	6	6	16.5
UEL 189	1	1	1	1	1	1	1	1	1	1	7.0
	2	1	1	1	1	1	1	1	1	1	7.5
	3	1	1	1	1	1	1	4	6	6	9.5
	4	1	1	1	3	4	6	8	8	8	22.0
	5	1	1	1	3	4	6	8	8	8	22.5
UEL 137	1	1	1	1	1	1	1	3	3	3	8.0
	2	1	1	1	1	1	3	4	6	6	11.0
	3	1	1	1	1	3	4	4	6	6	14.5
	4	1	1	1	1	1	1	1	1	1	8.5
	5	1	1	1	1	1	1	3	3	3	10.0
UEL 114	1	1	1	1	1	1	1	1	1	1	7.0
	2	1	1	1	1	1	1	1	1	1	7.5
	3	1	1	1	1	1	1	1	1	1	8.0
	4	1	1	1	1	1	1	1	1	1	8.5
	5	1	1	1	1	1	1	1	1	1	9.0
UEL 105	1	1	1	1	1	1	1	1	1	1	7.0
	2	1	1	1	1	1	1	1	1	1	7.5
	3	1	1	1	1	1	3	4	6	6	11.5
	4	1	1	1	1	1	3	4	6	6	12.0
	5	1	1	1	1	1	1	1	1	1	9.0
UEL 145	1	1	1	1	1	1	1	3	4	4	8.0
	2	1	1	1	1	1	1	1	1	1	7.5
	3	1	1	1	1	1	1	4	6	6	9.5
	4	1	1	1	1	1	1	4	6	6	10.0
	5	1	1	1	1	1	1	1	1	1	9.0
UEL 214	1	1	1	1	1	1	1	1	3	3	7.0
	2	1	1	1	1	1	1	1	3	3	7.5
	3	1	1	1	1	1	1	1	1	1	8.0
	4	1	1	1	1	1	1	1	1	1	8.5
	5	1	1	1	1	1	1	1	1	1	9.0
UEL 113	1	1	1	1	1	1	1	1	1	1	7.0
	2	1	1	1	1	1	1	1	1	1	7.5
	3	1	1	1	1	1	1	1	1	1	8.0
	4	1	1	1	1	1	1	1	1	1	8.5
	5	1	1	1	1	1	1	1	1	1	9.0
UEL 207	1	1	1	1	1	3	4	4	6	6	13.5
	2	1	1	1	3	4	4	6	6	6	18.0
	3	1	1	1	1	3	3	3	3	3	13.0
	4	1	1	1	1	3	4	6	6	6	16.0
	5	1	1	1	1	1	3	4	4	4	12.5
UEL 116	1	1	1	1	1	3	4	6	8	8	14.5
	2	1	1	1	1	3	4	8	8	8	16.0
	3	1	1	1	3	4	4	8	8	8	19.5
	4	1	1	1	3	4	6	6	8	8	21.0
	5	1	1	1	3	6	8	10	10	10	27.5
UEL 212	1	1	1	1	1	1	1	1	3	3	7.0
	2	1	1	1	1	1	3	4	4	4	11.0
	3	1	1	1	1	1	1	3	4	4	9.0
	4	1	1	1	1	1	3	4	4	4	12.0
	5	1	1	1	1	1	1	3	4	4	10.0
UEL 219	1	1	1	1	1	1	1	3	4	4	8.0
	2	1	1	1	1	1	1	1	1	1	7.5
	3	1	1	1	1	1	1	1	1	1	8.0
	4	1	1	1	1	3	3	3	4	4	13.5
	5	1	1	1	1	1	1	1	1	1	9.0
UEL 130	1	1	1	1	3	3	3	4	6	6	14.5
	2	1	1	1	1	1	1	1	3	3	7.5
	3	1	1	1	3	3	3	3	3	3	15.0
	4	1	1	1	1	1	1	1	1	1	8.5
	5	1	1	1	1	1	3	4	6	6	12.5
UEL 110	1	1	1	1	1	1	1	1	1	1	7.0
	2	1	1	1	1	1	1	1	1	1	7.5
	3	1	1	1	1	1	1	1	1	1	8.0
	4	1	1	1	1	1	1	1	1	1	8.5
	5	1	1	1	1	1	1	1	1	1	9.0
UEL 136	1	1	1	1	1	1	1	1	1	1	7.0
	2	1	1	1	1	1	3	4	6	6	11.0
	3	1	1	1	1	1	1	1	1	1	8.0
	4	1	1	1	1	1	3	4	6	6	12.0
	5	1	1	1	1	1	1	1	1	1	9.0
UEL 141	1	1	1	1	1	1	3	4	6	6	10.5
	2	1	1	1	1	1	1	1	1	1	7.5
	3	1	1	1	1	1	1	1	1	1	8.0
	4	1	1	1	1	1	1	1	1	1	8.5
	5	1	1	1	1	1	1	3	4	4	10.0
UEL 210	1	1	1	1	1	1	1	1	1	1	7.0
	2	1	1	1	1	1	1	1	1	1	7.5
	3	1	1	1	1	1	1	1	1	1	8.0
	4	1	1	1	1	1	1	1	1	1	8.5
	5	1	1	1	1	1	1	1	1	1	9.0
UEL 187	1	1	1	1	1	1	1	3	4	4	8.0
	2	1	1	1	1	1	1	3	4	4	8.5
	3	1	1	1	1	1	1	1	1	1	8.0
	4	1	1	1	1	1	1	1	1	1	8.5
	5	1	1	1	1	1	1	1	1	1	9.0
UEL 182	1	1	1	1	1	1	1	1	1	1	7.0
	2	1	1	1	1	1	1	1	1	1	7.5
	3	1	1	1	1	1	1	1	1	1	8.0
	4	1	1	1	1	3	3	3	3	3	13.5
	5	1	1	1	1	1	3	3	3	3	12.0
UEL 101	1	1	1	1	1	1	1	1	1	1	7.0
	2	1	1	1	1	1	1	1	1	1	7.5
	3	1	1	1	1	1	1	3	3	3	9.0
	4	1	1	1	1	1	1	1	1	1	8.5
	5	1	1	1	1	1	1	1	3	3	9.0
UEL 190	1	1	1	1	1	1	1	1	1	1	7.0
	2	1	1	1	1	1	1	1	1	1	7.5
	3	1	1	1	1	1	1	1	1	1	8.0
	4	1	1	1	1	1	1	3	3	3	9.5
	5	1	1	1	1	1	1	1	1	1	9.0
UEL 216	1	1	1	1	1	1	1	1	1	1	7.0
	2	1	1	1	1	1	1	1	1	1	7.5
	3	1	1	1	1	1	1	1	1	1	8.0
	4	1	1	1	1	1	1	3	4	4	9.5
	5	1	1	1	1	1	1	1	3	3	9.0
UEL 111	1	1	1	1	1	1	1	1	1	1	7.0
	2	1	1	1	1	1	1	1	1	1	7.5
	3	1	1	1	1	1	1	3	4	4	9.0
	4	1	1	1	1	1	1	1	1	1	8.5
	5	1	1	1	1	1	1	1	1	1	9.0
UEL 119	1	1	1	1	1	1	1	1	3	3	7.0
	2	1	1	1	1	1	1	1	3	3	7.5
	3	1	1	1	1	1	3	4	6	6	11.5
	4	1	1	1	1	1	1	1	1	1	8.5
	5	1	1	1	1	1	1	1	1	1	9.0
UEL 107	1	1	1	1	1	1	1	1	1	1	7.0
	2	1	1	1	1	1	3	4	4	4	11.0
	3	1	1	1	1	1	1	1	1	1	8.0
	4	1	1	1	1	1	1	1	1	1	8.5
	5	1	1	1	1	1	1	1	1	1	9.0
UEL 126	1	1	1	1	1	1	1	1	1	1	7.0
	2	1	1	1	1	1	1	1	1	1	7.5
	3	1	1	1	1	1	1	3	4	4	9.0
	4	1	1	1	1	1	1	1	1	1	8.5
	5	1	1	1	1	1	1	1	1	1	9.0
UEL 134	1	1	1	1	1	3	4	6	10	10	14.5
	2	1	1	1	1	1	1	1	1	1	7.5
	3	1	1	1	3	4	4	6	8	8	18.5
	4	1	1	1	1	1	1	1	1	1	8.5
	5	1	1	1	1	1	3	4	4	4	12.5
UEL 163	1	1	1	1	1	1	1	1	1	1	7.0
	2	1	1	1	1	1	1	1	1	1	7.5
	3	1	1	1	1	1	1	1	1	1	8.0
	4	1	1	1	1	1	1	1	1	1	8.5
	5	1	1	1	1	1	1	1	1	1	9.0
UEL 104	1	1	1	1	1	1	1	1	1	1	7.0
	2	1	1	1	1	1	1	1	1	1	7.5
	3	1	1	1	1	1	1	3	4	4	9.0
	4	1	1	1	1	1	3	4	4	4	12.0
	5	1	1	1	1	1	3	4	4	4	12.5
UEL 208	1	1	1	1	1	1	1	1	1	1	7.0
	2	1	1	1	1	1	1	1	1	1	7.5
	3	1	1	1	1	1	1	3	4	4	9.0
	4	1	1	1	1	1	1	1	1	1	8.5
	5	1	1	1	1	1	1	3	4	4	10.0
UEL 118	1	1	1	1	1	1	1	1	1	1	7.0
	2	1	1	1	1	1	1	1	1	1	7.5
	3	1	1	1	1	1	1	1	1	1	8.0
	4	1	1	1	1	1	1	1	1	1	8.5
	5	1	1	1	1	1	1	1	1	1	9.0
UEL 135	1	1	1	1	1	1	1	1	1	1	7.0
	2	1	1	1	1	1	1	1	1	1	7.5
	3	1	1	1	1	1	3	3	3	3	11.0
	4	1	1	1	1	1	1	1	1	1	8.5
	5	1	1	1	1	1	1	1	1	1	9.0
UEL 200	1	1	1	1	1	1	1	1	3	3	7.0
	2	1	1	1	1	1	1	1	1	1	7.5
	3	1	1	1	1	1	1	1	1	1	8.0
	4	1	1	1	1	1	1	1	3	3	8.5
	5	1	1	1	1	1	1	1	1	1	9.0
UEL 172	1	1	1	1	1	1	1	1	1	1	7.0
	2	1	1	1	1	1	1	1	1	1	7.5
	3	1	1	1	1	1	4	6	10	10	13.5
	4	1	1	1	1	1	1	1	1	1	8.5
	5	1	1	1	1	1	1	1	3	3	9.0
UEL 184	1	1	1	1	1	1	3	6	6	6	11.5
	2	1	1	1	1	1	1	1	1	1	7.5
	3	1	1	1	1	1	1	3	3	3	9.0
	4	1	1	1	1	1	1	1	1	1	8.5
	5	1	1	1	1	1	1	1	1	1	9.0
UEL 177	1	1	1	1	1	1	1	1	3	3	7.0
	2	1	1	1	1	1	1	1	1	1	7.5
	3	1	1	1	1	1	1	1	3	3	8.0
	4	1	1	1	1	1	1	1	1	1	8.5
	5	1	1	1	1	1	1	1	1	1	9.0
UEL 159	1	1	1	1	3	3	3	3	3	3	14.0
	2	1	1	1	1	1	1	1	1	1	7.5
	3	1	1	1	1	1	1	1	1	1	8.0
	4	1	1	1	1	3	3	3	3	3	13.5
	5	1	1	1	1	1	1	1	1	1	9.0
UEL 103	1	1	1	1	1	1	1	1	1	1	7.0
	2	1	1	1	1	1	1	1	1	1	7.5
	3	1	1	1	1	1	1	1	1	1	8.0
	4	1	1	1	1	1	1	1	1	1	8.5
	5	1	1	1	1	1	1	1	1	1	9.0
UEL 215	1	1	1	1	1	1	1	1	1	1	7.0
	2	1	1	1	1	1	1	1	3	3	7.5
	3	1	1	1	1	1	1	1	1	1	8.0
	4	1	1	1	1	1	1	1	1	1	8.5
	5	1	1	1	1	1	1	1	1	1	9.0
UEL 156	1	1	1	1	1	1	1	1	1	1	7.0
	2	1	1	1	1	1	1	1	1	1	7.5
	3	1	1	1	1	1	1	1	1	1	8.0
	4	1	1	1	1	1	1	1	1	1	8.5
	5	1	1	1	1	1	1	1	1	1	9.0
UEL 223	1	1	1	1	1	1	1	1	1	1	7.0
	2	1	1	1	1	1	1	3	3	3	8.5
	3	1	1	1	1	1	1	1	1	1	8.0
	4	1	1	1	1	1	1	1	1	1	8.5
	5	1	1	1	1	1	1	1	1	1	9.0
UEL 146	1	1	1	1	1	1	1	1	1	1	7.0
	2	1	1	1	1	1	1	1	1	1	7.5
	3	1	1	1	1	1	1	1	1	1	8.0
	4	1	1	1	1	1	1	1	1	1	8.5
	5	1	1	1	1	1	1	1	1	1	9.0
UEL 128	1	1	1	1	3	4	6	6	6	6	19.5
	2	1	1	1	1	3	4	6	6	6	15.0
	3	1	1	1	3	3	4	6	6	6	17.5
	4	1	1	1	3	3	4	6	6	6	18.0
	5	1	1	1	1	3	4	6	6	6	16.5
UEL 129	1	1	1	1	1	4	6	6	6	6	17.5
	2	1	1	1	1	1	1	1	1	1	7.5
	3	1	1	1	1	1	1	3	3	3	9.0
	4	1	1	1	1	4	6	6	6	6	19.0
	5	1	1	1	1	1	3	6	6	6	13.5
UEL 132	1	1	1	1	1	1	3	3	4	4	10.0
	2	1	1	1	1	1	3	3	3	3	10.5
	3	1	1	1	1	1	1	1	1	1	8.0
	4	1	1	1	1	1	1	1	1	1	8.5
	5	1	1	1	1	1	3	6	6	6	13.5
UEL 150	1	1	1	1	1	1	1	1	1	1	7.0
	2	1	1	1	1	1	3	6	8	8	12.0
	3	1	1	1	1	3	4	6	6	6	15.5
	4	1	1	1	1	1	1	1	1	1	8.5
	5	1	1	1	1	1	1	1	1	1	9.0
UEL 201	1	1	1	1	1	1	1	1	1	1	7.0
	2	1	1	1	1	1	1	1	1	1	7.5
	3	1	1	1	1	3	4	6	8	8	15.5
	4	1	1	1	1	1	1	1	1	1	8.5
	5	1	1	1	1	1	1	1	1	1	9.0
UEL 178	1	1	1	1	1	1	1	1	1	1	7.0
	2	1	1	1	1	1	1	1	1	1	7.5
	3	1	1	1	1	1	1	1	1	1	8.0
	4	1	1	1	1	1	3	4	4	4	12.0
	5	1	1	1	1	1	3	3	4	4	12.0
UEL 131	1	1	1	1	1	3	3	4	6	6	12.5
	2	1	1	1	1	1	3	4	4	4	11.0
	3	1	1	1	3	4	4	6	8	8	18.5
	4	1	1	1	1	1	3	4	4	4	12.0
	5	1	1	1	3	4	4	6	8	8	19.5

## Sheet: Data_unripe fruits
Accession	rep	day1	day2	day3	day4	day5	day6	day7	day8	Score	AUDPC
UEL 193	1	1	1	1	6	6	8	10	10	10	28.5
	2	1	3	4	6	6	8	10	10	10	34.0
	3	1	1	3	6	6	8	10	10	10	31.5
	4	1	1	1	1	1	3	6	8	8	13.0
	5	1	1	1	1	1	3	6	8	8	13.5
UEL 157	1	1	1	1	1	1	1	3	3	3	8.0
	2	1	1	1	4	6	8	10	10	10	27.0
	3	1	1	1	1	3	4	8	10	10	16.5
	4	1	1	1	1	3	6	8	10	10	19.0
	5	1	1	1	1	1	1	3	3	3	10.0
UEL 189	1	1	1	3	4	6	6	8	10	10	25.5
	2	1	1	3	4	6	6	8	10	10	26.0
	3	1	1	3	4	6	6	8	10	10	26.5
	4	1	1	3	4	6	6	8	10	10	27.0
	5	1	1	3	4	6	6	8	10	10	27.5
UEL 137	1	1	1	1	3	4	6	8	8	8	20.5
	2	1	1	1	3	4	6	8	10	10	21.0
	3	1	1	1	3	4	6	6	6	6	20.5
	4	1	1	1	1	1	1	3	4	4	9.5
	5	1	1	1	1	3	4	6	8	8	16.5
UEL 114	1	1	1	1	1	4	6	8	10	10	18.5
	2	1	1	1	3	6	8	8	10	10	25.0
	3	1	1	1	1	1	1	3	4	4	9.0
	4	1	1	1	1	1	3	6	8	8	13.0
	5	1	1	1	1	4	8	10	10	10	23.5
UEL 105	1	1	1	1	3	3	3	4	6	6	14.5
	2	1	1	1	1	1	3	6	10	10	12.0
	3	1	1	1	4	6	6	8	10	10	24.5
	4	1	1	1	1	3	3	4	6	6	14.0
	5	1	1	1	3	6	8	8	10	10	26.5
UEL 145	1	1	1	1	3	4	6	8	10	10	20.5
	2	1	1	1	1	3	3	4	6	6	13.0
	3	1	1	1	4	6	6	8	10	10	24.5
	4	1	1	1	4	6	6	8	10	10	25.0
	5	1	1	1	1	3	3	4	6	6	14.5
UEL 214	1	1	1	1	1	1	3	4	4	4	10.5
	2	1	1	1	1	1	3	4	6	6	11.0
	3	1	1	1	1	1	3	4	6	6	11.5
	4	1	1	1	3	3	4	6	8	8	18.0
	5	1	1	1	1	3	4	6	8	8	16.5
UEL 113	1	1	1	1	1	4	6	6	6	6	17.5
	2	1	1	1	1	1	1	1	1	1	7.5
	3	1	1	1	1	1	3	4	4	4	11.5
	4	1	1	1	1	1	1	1	1	1	8.5
	5	1	1	1	1	1	1	1	1	1	9.0
UEL 207	1	1	1	1	3	4	6	6	6	6	19.5
	2	1	1	1	3	4	6	8	8	8	21.0
	3	1	1	1	3	4	6	6	6	6	20.5
	4	1	1	1	3	4	6	6	8	8	21.0
	5	1	1	1	3	4	6	6	6	6	21.5
UEL 116	1	1	1	1	3	6	6	8	10	10	22.5
	2	1	1	1	4	6	6	8	10	10	24.0
	3	1	1	1	3	4	6	8	10	10	21.5
	4	1	1	1	4	6	6	6	8	8	24.0
	5	1	1	1	3	4	6	6	8	8	21.5
UEL 212	1	1	1	1	3	4	4	6	8	8	17.5
	2	1	1	1	3	4	4	6	8	8	18.0
	3	1	1	1	3	4	4	4	6	6	17.5
	4	1	1	1	3	4	4	6	8	8	19.0
	5	1	1	1	3	4	4	6	8	8	19.5
UEL 219	1	1	1	1	3	4	4	6	8	8	17.5
	2	1	1	1	3	4	4	6	8	8	18.0
	3	1	1	1	3	4	4	6	6	6	18.5
	4	1	1	1	1	3	3	4	6	6	14.0
	5	1	1	1	1	3	3	4	6	6	14.5
UEL 130	1	1	1	1	1	4	6	6	8	8	17.5
	2	1	1	1	3	4	4	4	6	6	17.0
	3	1	1	1	3	4	4	4	4	4	17.5
	4	1	1	1	3	3	3	3	4	4	15.5
	5	1	1	1	3	3	4	6			18.5
UEL 110	1	1	1	1	3	4	4	6	10		17.5
	2	1	1	1	3	4	4	8	10		19.0
	3	1	1	1	3	6	8	8	10		25.5
	4	1	1	1	6	6	8	8	10		29.0
	5	1	1	1	4	6	8	8	10		27.5
UEL 136	1	1	1	3	4	6	6	6	8		24.5
	2	1	1	1	3	4	6	6	6		20.0
	3	1	1	1	3	4	6	6	6		20.5
	4	1	1	1	1	3	4	6	6		16.0
	5	1	1	1	1	1	1	1	1		9.0
UEL 141	1	1	1	1	3	4	6	6	6		19.5
	2	1	1	1	1	1	1	3	4		8.5
	3	1	1	1	1	4	4	6	6		16.5
	4	1	1	1	1	1	3	4	4		12.0
	5	1	1	1	1	3	4	6	6		16.5
UEL 210	1	1	1	1	1	3	3	3	3		12.0
	2	1	1	1	3	4	6	8	8		21.0
	3	1	1	1	3	3	6	8	8		20.5
	4	1	1	1	1	3	6	8	8		19.0
	5	1	1	1	1	3	3	3	3		14.0
UEL 187	1	1	1	1	3	4	6	6	8		19.5
	2	1	1	1	3	4	6	6	8		20.0
	3	1	1	1	1	3	4	6	8		15.5
	4	1	1	1	1	3	4	6	8		16.0
	5	1	1	1	1	3	3	3	3		14.0
UEL 182	1	1	1	1	1	3	4	4	6		13.5
	2	1	1	1	1	3	4	4	4		14.0
	3	1	1	1	1	1	1	4	4		9.5
	4	1	1	1	1	3	4	4	4		15.0
	5	1	1	1	1	1	1	1	3		9.0
UEL 101	1	1	1	1	1	3	6	8	10		17.5
	2	1	1	1	3	4	6	8	10		21.0
	3	1	1	1	3	4	6	8	10		21.5
	4	1	1	1	3	4	6	8	10		22.0
	5	1	1	1	3	4	6	8	10		22.5
UEL 190	1	1	1	1	4	6	6	6	8		22.5
	2	1	1	1	1	3	4	4	4		14.0
	3	1	1	1	1	3	4	4	6		14.5
	4	1	1	1	3	4	6	6	8		21.0
	5	1	1	1	4	6	6	6	8		24.5
UEL 216	1	1	1	1	1	1	3	4	6		10.5
	2	1	1	1	3	3	4	4	6		16.0
	3	1	1	1	1	3	6	8	10		18.5
	4	1	1	1	3	3	4	6	8		18.0
	5	1	1	1	3	4	6	8	10		22.5
UEL 111	1	1	1	1	3	4	6	6	6		19.5
	2	1	1	1	3	4	6	6	6		20.0
	3	1	1	1	1	3	4	6	6		15.5
	4	1	1	1	1	4	4	6	6		17.0
	5	1	1	1	3	4	4	6	6		19.5
UEL 119	1	1	1	1	1	1	1	1	1		7.0
	2	1	1	1	1	1	1	1	1		7.5
	3	1	1	1	1	1	1	3	4		9.0
	4	1	1	1	1	1	1	1	3		8.5
	5	1	1	1	3	3	4	6	8		18.5
UEL 107	1	1	1	1	4	4	6	6	8		20.5
	2	1	1	1	3	4	6	6	6		20.0
	3	1	1	1	3	4	6	6	8		20.5
	4	1	1	1	3	4	6	6	8		21.0
	5	1	1	1	3	4	6	6	8		21.5
UEL 126	1	1	1	1	1	1	1	1	1		7.0
	2	1	1	1	1	1	1	1	1		7.5
	3	1	1	1	3	4	6	6	8		20.5
	4	1	1	1	1	1	1	1	1		8.5
	5	1	1	1	3	4	4	6	8		19.5
UEL 134	1	1	3	4	6	8	8	10	10		35.5
	2	1	3	4	6	8	10	10	10		38.0
	3	1	3	4	6	8	8	10	10		36.5
	4	1	3	4	6	8	10	10	10		39.0
	5	1	3	4	6	8	8	10	10		37.5
UEL 163	1	1	1	1	3	4	4	6	6		17.5
	2	1	1	1	3	4	4	6	6		18.0
	3	1	1	1	3	4	6	6	6		20.5
	4	1	1	1	1	1	3	4	6		12.0
	5	1	1	1	3	4	6	6	6		21.5
UEL 104	1	1	1	1	1	3	3	4	6		12.5
	2	1	1	1	3	4	6	8	8		21.0
	3	1	1	1	3	4	6	8	10		21.5
	4	1	1	1	1	3	3	4	6		14.0
	5	1	1	1	1	3	3	4	6		14.5
UEL 208	1	1	1	1	1	1	1	1	1		7.0
	2	1	1	1	1	1	3	4	6		11.0
	3	1	1	1	1	1	1	1	1		8.0
	4	1	1	1	3	4	6	6	6		21.0
	5	1	1	1	1	1	1	1	1		9.0
UEL 118	1	1	1	1	4	6	6	8	8		23.5
	2	1	1	1	1	1	1	1	1		7.5
	3	1	1	1	3	3	3	3	3		15.0
	4	1	1	1	1	1	1	1	1		8.5
	5	1	1	1	1	1	1	1	1		9.0
UEL 135	1	1	1	3	6	6	6	8	10		27.5
	2	1	1	1	1	3	8	8	10		20.0
	3	1	1	3	6	6	6	8	10		28.5
	4	1	1	3	6	6	8	8	10		31.0
	5	1	1	3	6	6	8	8	10		31.5
UEL 200	1	1	1	1	3	4	4	6	8		17.5
	2	1	1	1	6	6	6	10	10		27.0
	3	1	1	1	4	4	6	8	10		22.5
	4	1	1	1	3	4	4	4	6		18.0
	5	1	1	1	4	4	4	4	6		19.5
UEL 172	1	1	1	3	6	8	10	10	10		34.5
	2	1	1	1	4	6	8	10	10		27.0
	3	1	1	1	1	3	3	4	6		13.5
	4	1	1	1	4	6	6	8	10		25.0
	5	1	1	3	6	8	10	10	10		36.5
UEL 184	1	1	1	1	3	6	8	10	10		25.5
	2	1	1	1	4	6	8	10	10		27.0
	3	1	1	1	1	1	3	4	6		11.5
	4	1	1	1	4	6	6	10	10		26.0
	5	1	1	1	4	6	8	10	10		28.5
UEL 177	1	1	1	1	3	4	6	6	6		19.5
	2	1	1	1	1	4	6	6	6		18.0
	3	1	1	1	1	1	3	4	6		11.5
	4	1	1	1	1	1	1	1	1		8.5
	5	1	1	1	1	3	4	6	6		16.5
UEL 159	1	1	1	1	3	4	6	6	8		19.5
	2	1	1	1	1	1	3	4	6		11.0
	3	1	1	1	1	1	1	1	3		8.0
	4	1	1	1	1	3	6	6	8		18.0
	5	1	1	1	1	1	1	1	1		9.0
UEL 103	1	1	1	1	1	1	3	4	6		10.5
	2	1	1	1	1	1	3	4	6		11.0
	3	1	1	1	1	3	4	4	4		14.5
	4	1	1	1	1	3	4	4	4		15.0
	5	1	1	1	1	1	1	1	1		9.0
UEL 215	1	1	1	1	1	1	1	1	1		7.0
	2	1	1	1	1	1	1	3	4		8.5
	3	1	1	1	1	1	3	4	6		11.5
	4	1	1	1	1	1	1	1	1		8.5
	5	1	1	1	1	1	1	1	1		9.0
UEL 156	1	1	1	3	4	6	6	8	10		25.5
	2	1	1	1	1	1	3	4	6		11.0
	3	1	1	1	1	3	4	6	6		15.5
	4	1	1	1	1	3	4	6	6		16.0
	5	1	1	1	1	1	3	4	6		12.5
UEL 223	1	1	1	1	3	4	6	6	8		19.5
	2	1	1	1	3	4	6	6	8		20.0
	3	1	1	1	3	4	6	6	8		20.5
	4	1	1	1	3	4	6	6	8		21.0
	5	1	1	1	3	4	6	6	6		21.5
UEL 146	1	1	1	1	3	6	8	10	10		25.5
	2	1	1	1	3	4	6	8	10		21.0
	3	1	1	1	4	8	8	10	10		29.5
	4	1	1	1	3	4	6	8	10		22.0
	5	1	1	1	3	6	8	10	10		27.5
UEL 128	1	1	1	1	3	4	6	6	6		19.5
	2	1	1	1	3	4	6	6	6		20.0
	3	1	1	1	3	4	6	6	6		20.5
	4	1	1	1	3	4	6	6	6		21.0
	5	1	1	1	3	4	6	6	6		21.5
UEL 129	1	1	1	3	6	6	8	10	10		30.5
	2	1	1	1	4	6	8	10	10		27.0
	3	1	1	1	3	6	8	10	10		26.5
	4	1	1	3	4	6	8	10	10		30.0
	5	1	1	3	4	8	10	10	10		34.5
UEL 132	1	1	1	1	3	4	6	8	8		20.5
	2	1	1	1	3	4	6	8	8		21.0
	3	1	1	1	3	4	6	8	8		21.5
	4	1	1	1	3	4	6	8	8		22.0
	5	1	1	1	3	4	6	8	8		22.5
UEL 150	1	1	1	1	4	6	8	10	10		26.5
	2	1	1	1	4	6	6	6	8		23.0
	3	1	1	1	4	4	4	6	8		19.5
	4	1	1	1	4	6	8	10	10		28.0
	5	1	1	1	4	4	4	6	8		20.5
UEL 201	1	1	1	1	3	4	6	8	10		20.5
	2	1	1	1	3	6	8	10	10		26.0
	3	1	1	1	3	4	8	10	10		24.5
	4	1	1	1	3	4	6	8	10		22.0
	5	1	1	1	3	3	4	6	8		18.5
UEL 178	1	1	1	1	3	4	6	6	6		19.5
	2	1	1	1	1	3	4	6	6		15.0
	3	1	1	1	1	1	1	1	1		8.0
	4	1	1	1	3	4	6	6	6		21.0
	5	1	1	1	3	4	6	6	6		21.5
UEL 131	1	1	1	1	1	3	4	6	8		14.5
	2	1	1	3	4	6	8	8	10		28.0
	3	1	1	1	3	4	6	8	8		21.5
	4	1	1	1	1	3	4	6	6		16.0
	5	1	1	3	6	8	8	10	10		34.5
