# Supplementary material for: Solubility estimation and rapid structural characterization of small molecule drugs in polymers
Source: PeerJ journal article supplement (doi:10.7717/peerj.10782), 2012-01-01
Supplement: Supplemental_Figure_S4.pdf [file Supplemental_Figure_S4.pdf]

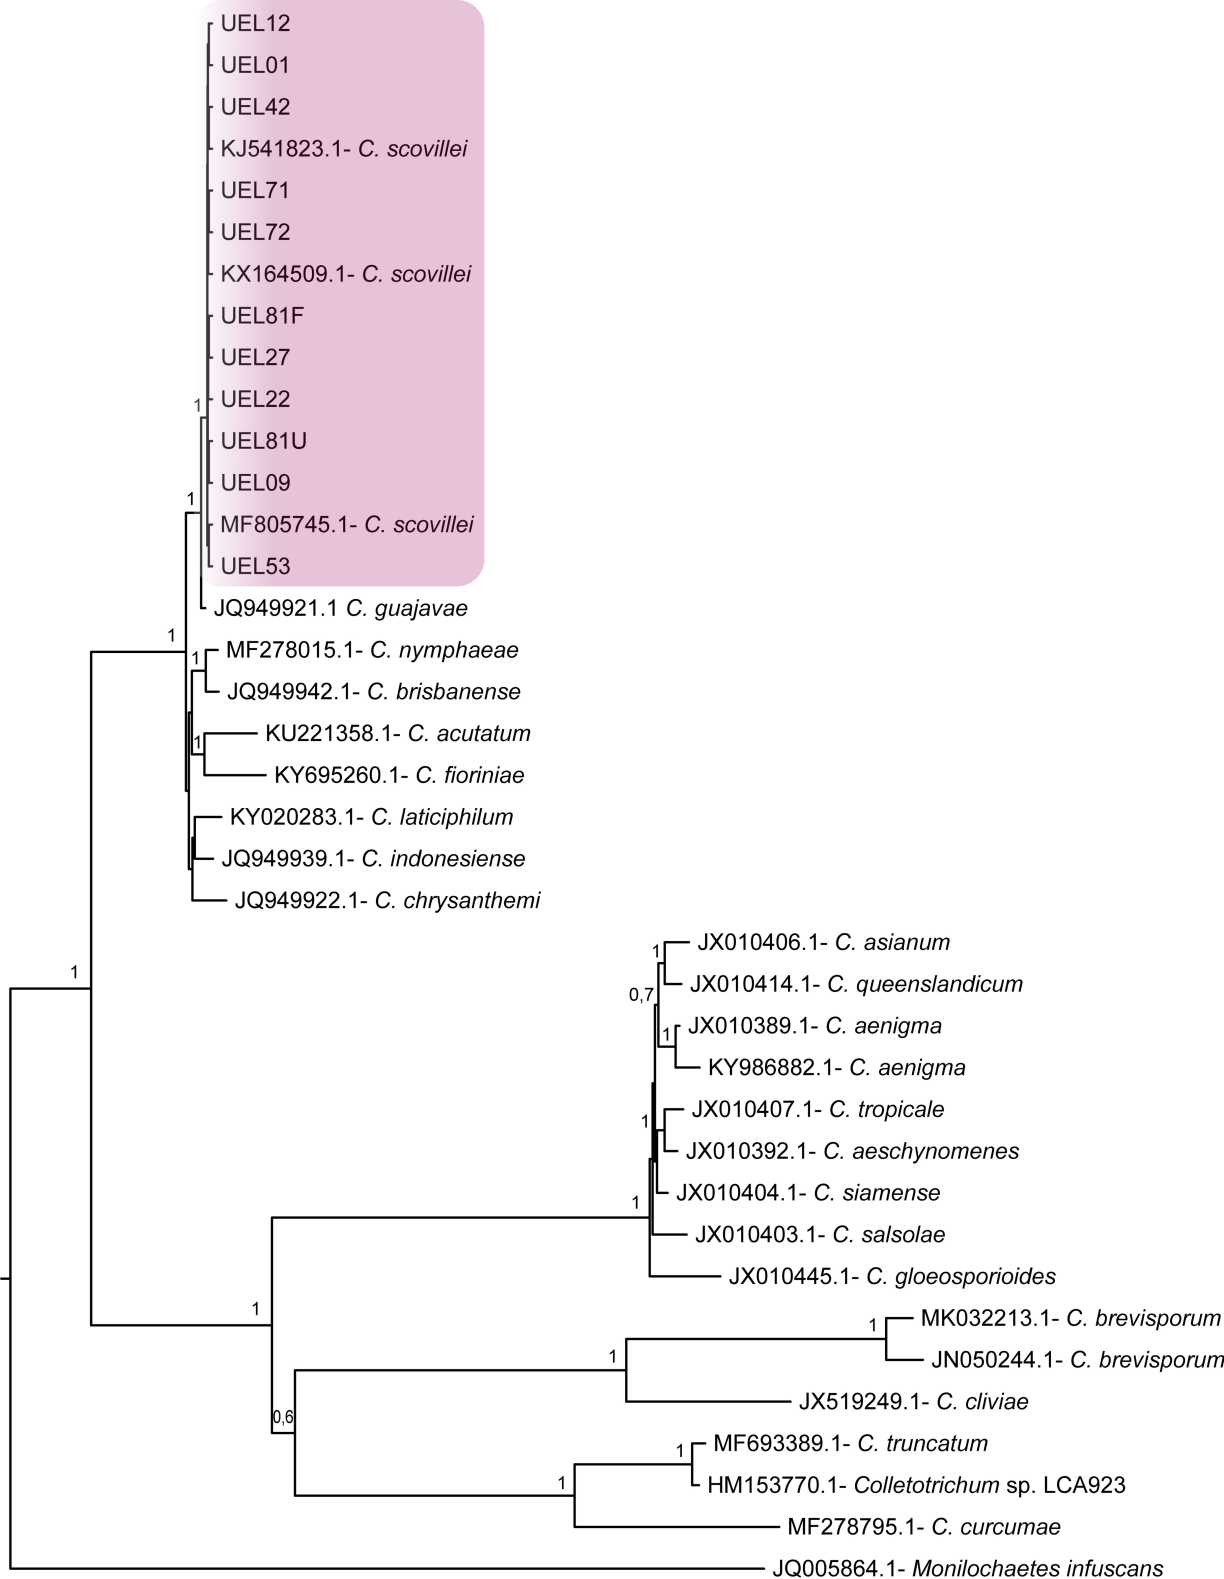

0,05
